# Supplementary material
Source: Research Square preprint supplement (doi:10.21203/rs.3.rs-9055686/v1)
Supplement: Supplementary file 1 [file 15a425554a3a8e5d4c303dc2.docx]

**Chitosan Nanoparticles as Interfacial Adjuvants to Enhance the Biodegradation of Polyethylene Terephthalate by *Ideonella sakaiensis***

Zhichao Shia,#, Tingbiao Wua,#, Lihong Wua, Xiaomin Chib, Yingjuan Wangb, Tingting Fana,*, Yuyang Jianga

a *Institute of Biomedical Health Technology and Engineering, Shenzhen Bay Laboratory, Shenzhen, 518132, China.*

b *National Innovation Center for Molecular Drug, GrandBio Molecular Drug Innovations Center Co., Ltd. 518102, China.*

#These authors equally contributed to this work.

*Corresponding author.

Email addresses: [fantt@szbl.ac.cn](mailto:fantt@szbl.ac.cn) (T. Fan)


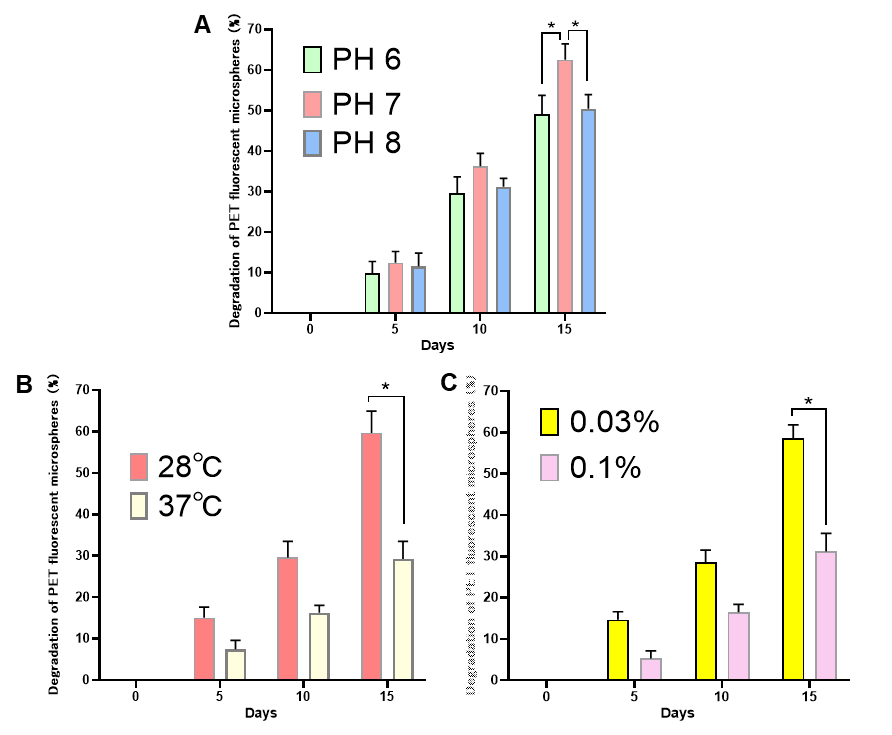


**Fig. S1. Degradation of PET fluorescent microspheres by *Ideonella sakaiensis* under different conditions.** (A) Effect of pH (6, 7, 8) on degradation over 15 days. (B) Effect of temperature (28 °C, 37 °C) on degradation over 15 days. (C) Effect of substrate concentration (0.03%, 0.1%) on degradation over 15 days. Data are mean ± SD (n = 3). **p* < 0.05.


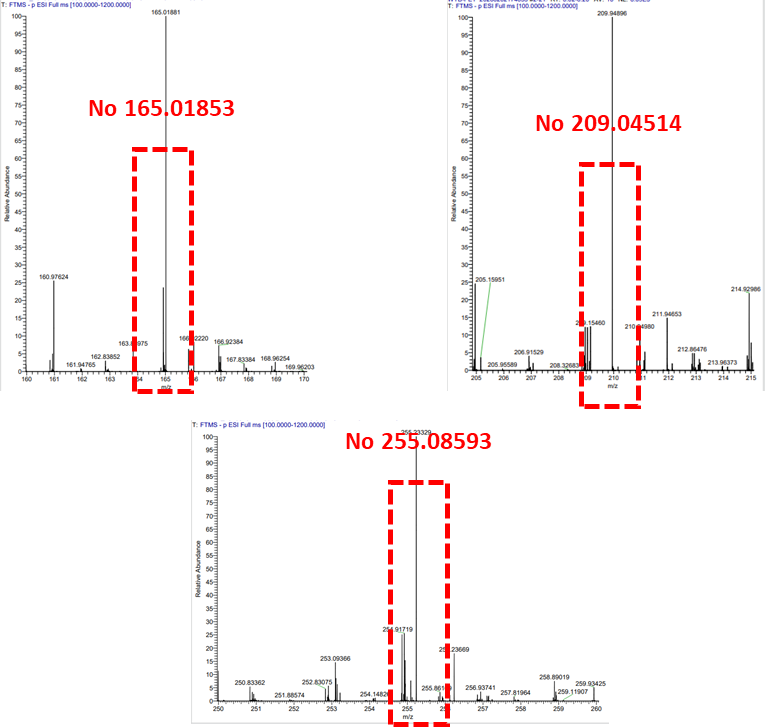


**Fig. S2. LC-MS analysis of PET powder degradation products in the control group (without *Ideonella sakaiensis*).**

LC-MS spectra showing the absence of characteristic monomer peaks for terephthalic acid (TPA, m/z = 165.01853), mono(2-hydroxyethyl) terephthalate (MHET, m/z = 209.04514), and bis(2-hydroxyethyl) terephthalate (BHET, m/z = 255.08593) in the control group, confirming that no significant PET hydrolysis occurred in the absence of *Ideonella sakaiensis.*

*
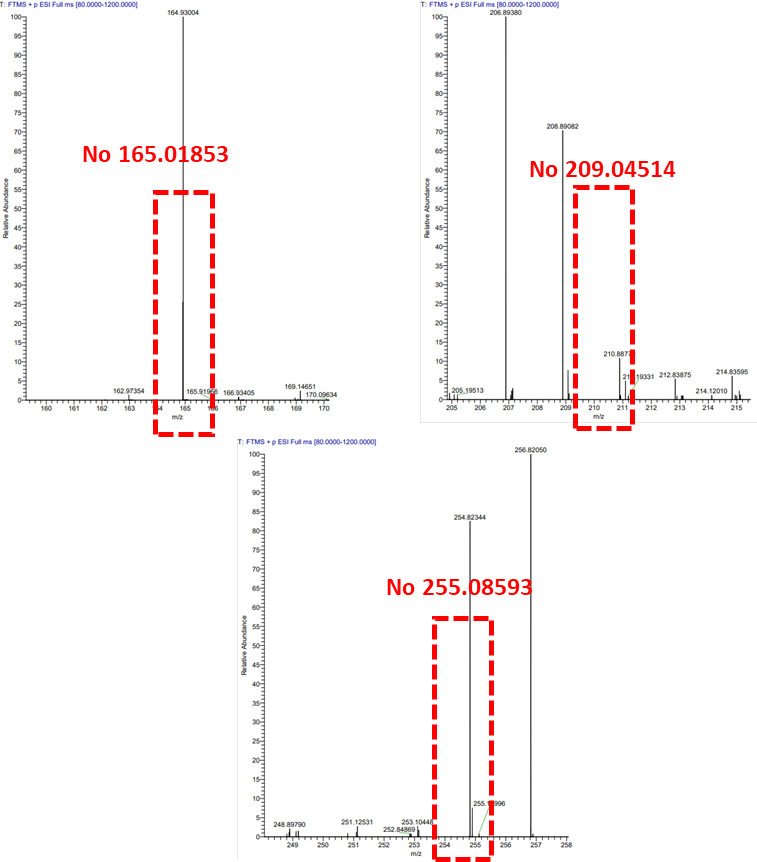
*

**Fig. S3. LC-MS analysis of the *Ideonella sakaiensis* only control group (without PET powder).**

LC-MS spectra confirm the absence of characteristic monomer peaks for terephthalic acid (TPA, m/z = 165.01853), mono(2-hydroxyethyl) terephthalate (MHET, m/z = 209.04514), and bis(2-hydroxyethyl) terephthalate (BHET, m/z = 255.08593), verifying that these products are derived from PET hydrolysis, not bacterial metabolism.


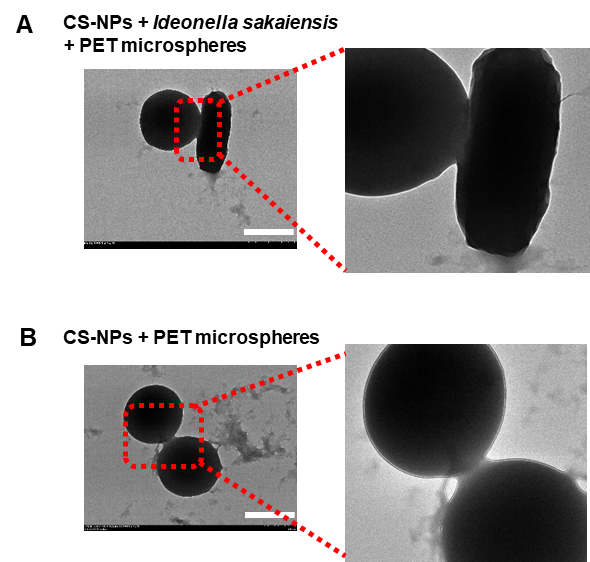


**Fig. S4. TEM analysis of chitosan nanoparticles (CS-NPs)** **mediated adsorption of *Ideonella sakaiensis* to PET microspheres.** (A) CS-NPs mediates tight adsorption of rod-shaped *Ideonella sakaiensis* to PET microspheres, with the magnified inset showing intimate contact. (B) Control (CS-NPs + PET microspheres only) confirms no rod-shaped structures in the absence of bacteria. CS-NPs acts as an interfacial mediator to enhance bacterial adhesion to PET, a prerequisite for efficient biodegradation. Scale bar: 1 μm.

**Table S1. Zeta potential analysis of *Ideonella sakaiensis*, PET fluorescent microspheres, and chitosan nanoparticles**

| **Group** | **CS-NPs** | ***Ideonella sakaiensis*** | **PET microspheres** |
| --- | --- | --- | --- |
| **Zeta (mV)** | 40.1±2.20 | -10.1±1.19 | -2.64±0.10 |
